# Supplementary figures and images for: Can electroencephalography (EEG) identify the different dimensions of pain in fibromyalgia? A pilot study
Source: PubMed Central journal article supplement — BMC Musculoskelet Disord. 2024 Sep 3;25:705. doi: 10.1186/s12891-024-07824-0 (PMC11370227; doi:10.1186/s12891-024-07824-0), 2024-09-03

**FIGURE 2**

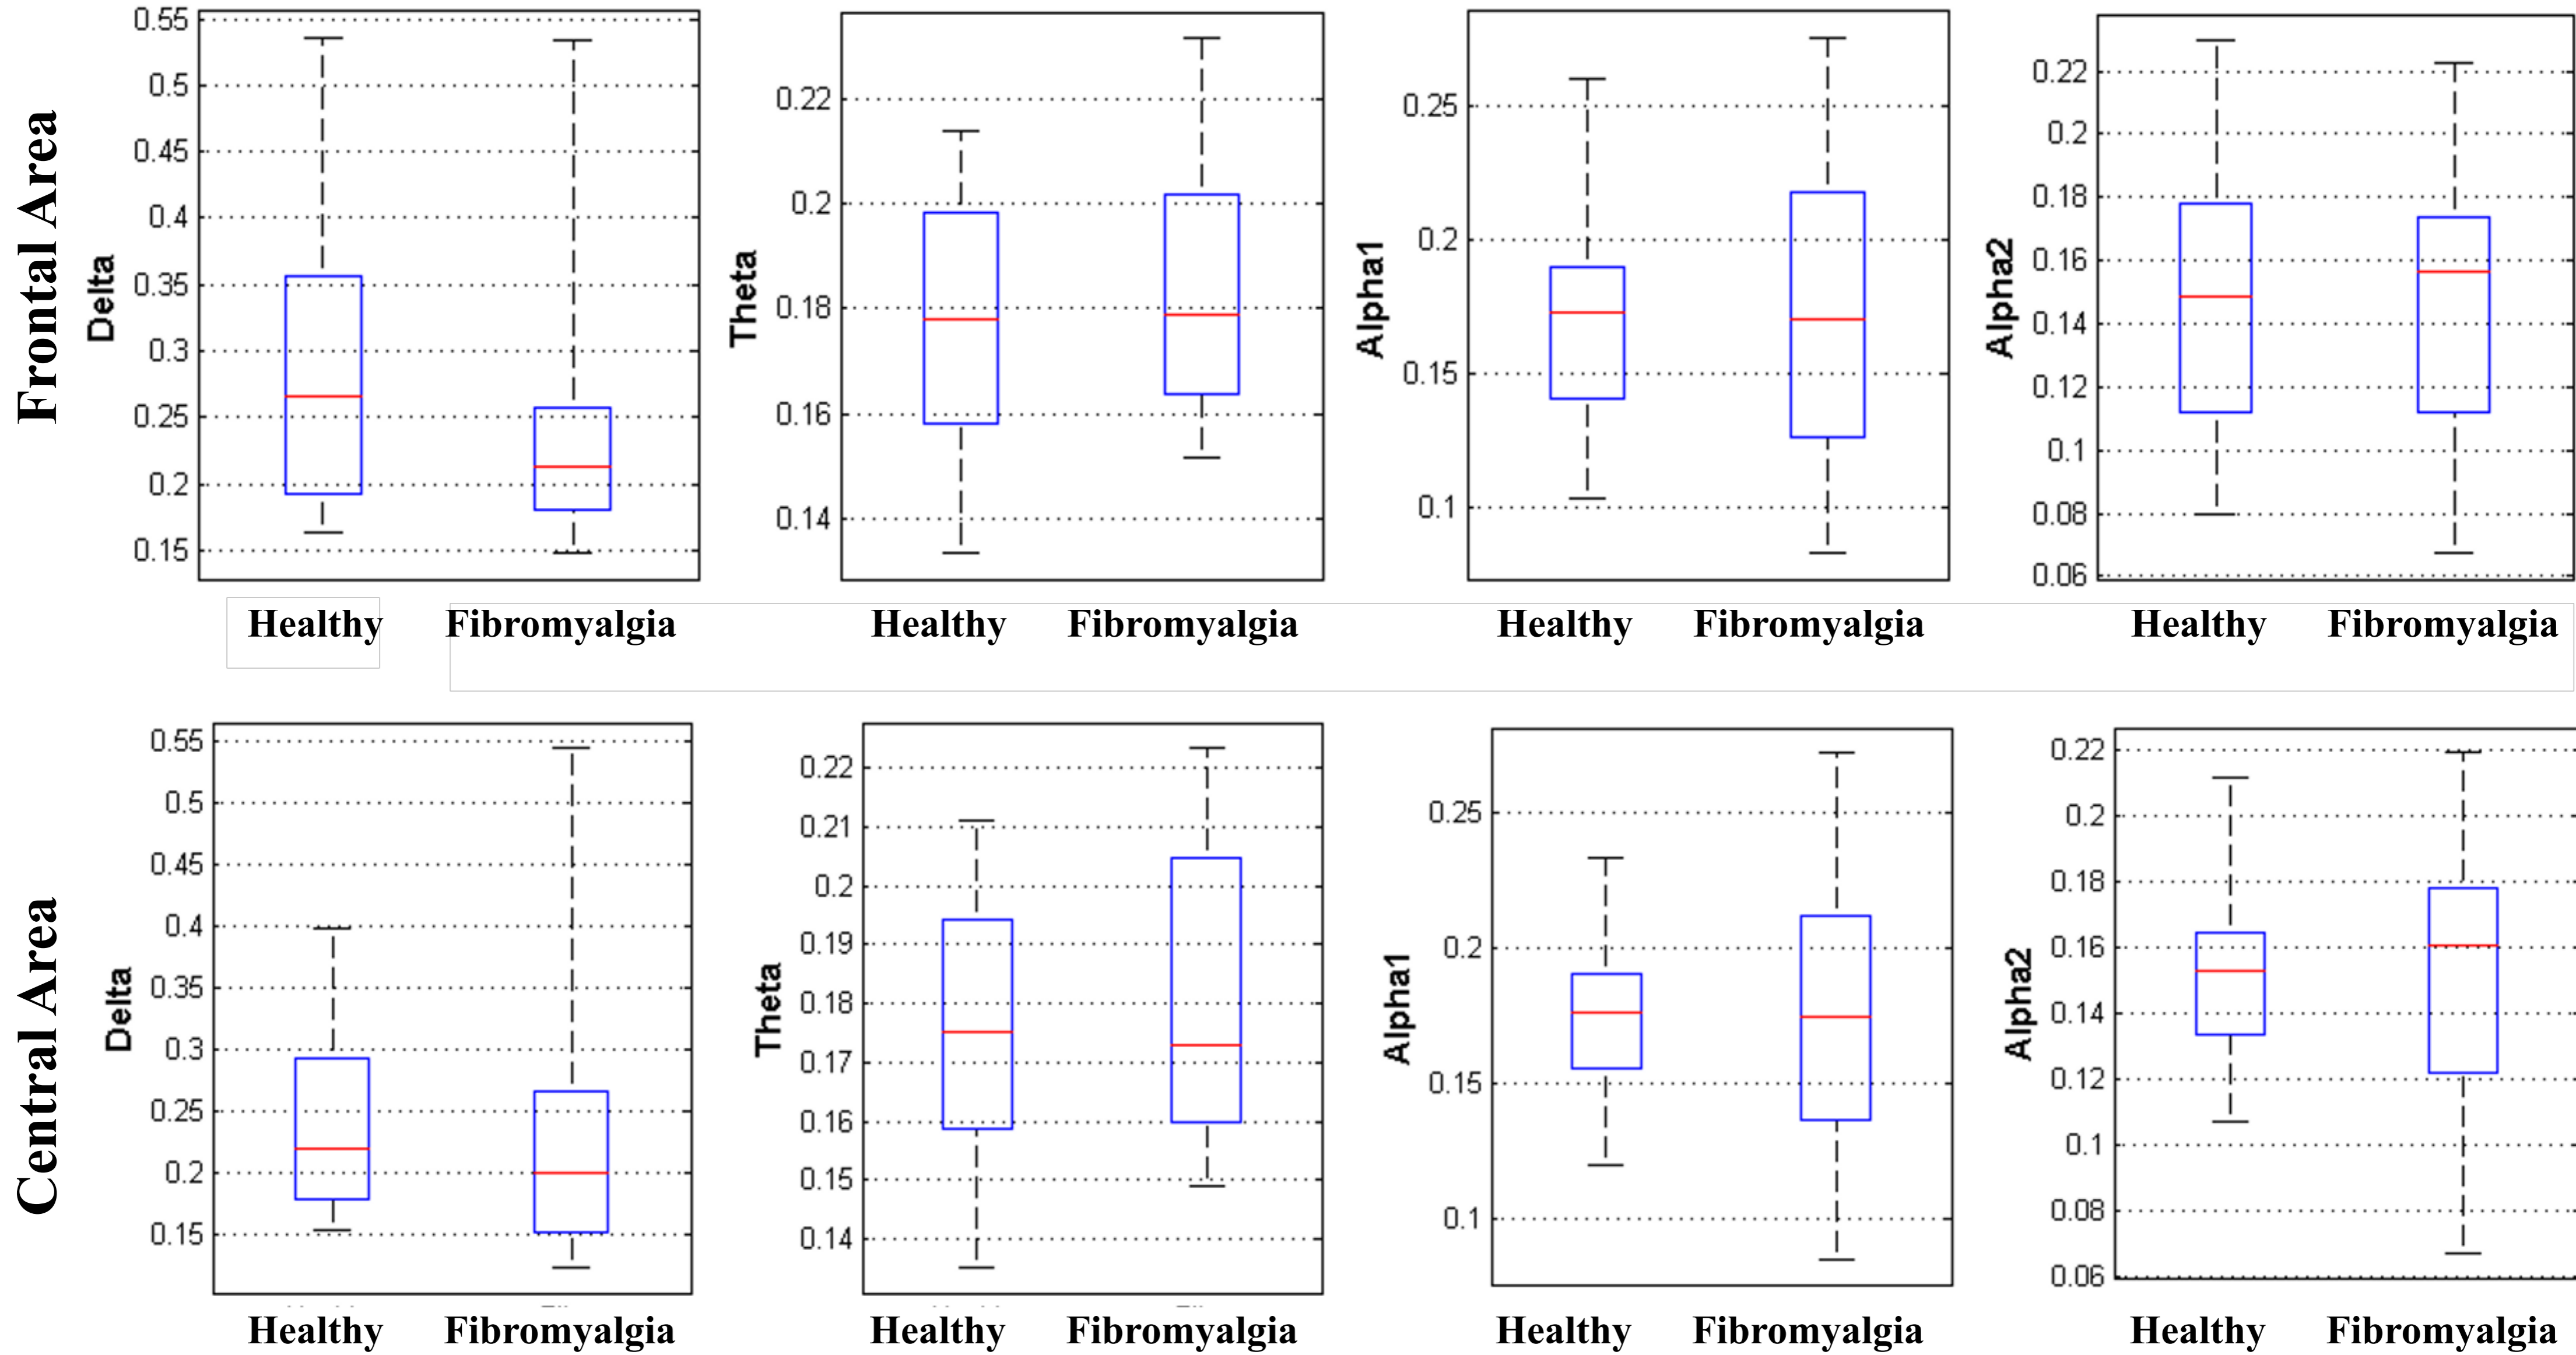

Supplement: 12891_2024_7824_MOESM1_ESM.pdf [file 12891_2024_7824_MOESM1_ESM.pdf]

**FIGURE 3**

**Frontal Area**

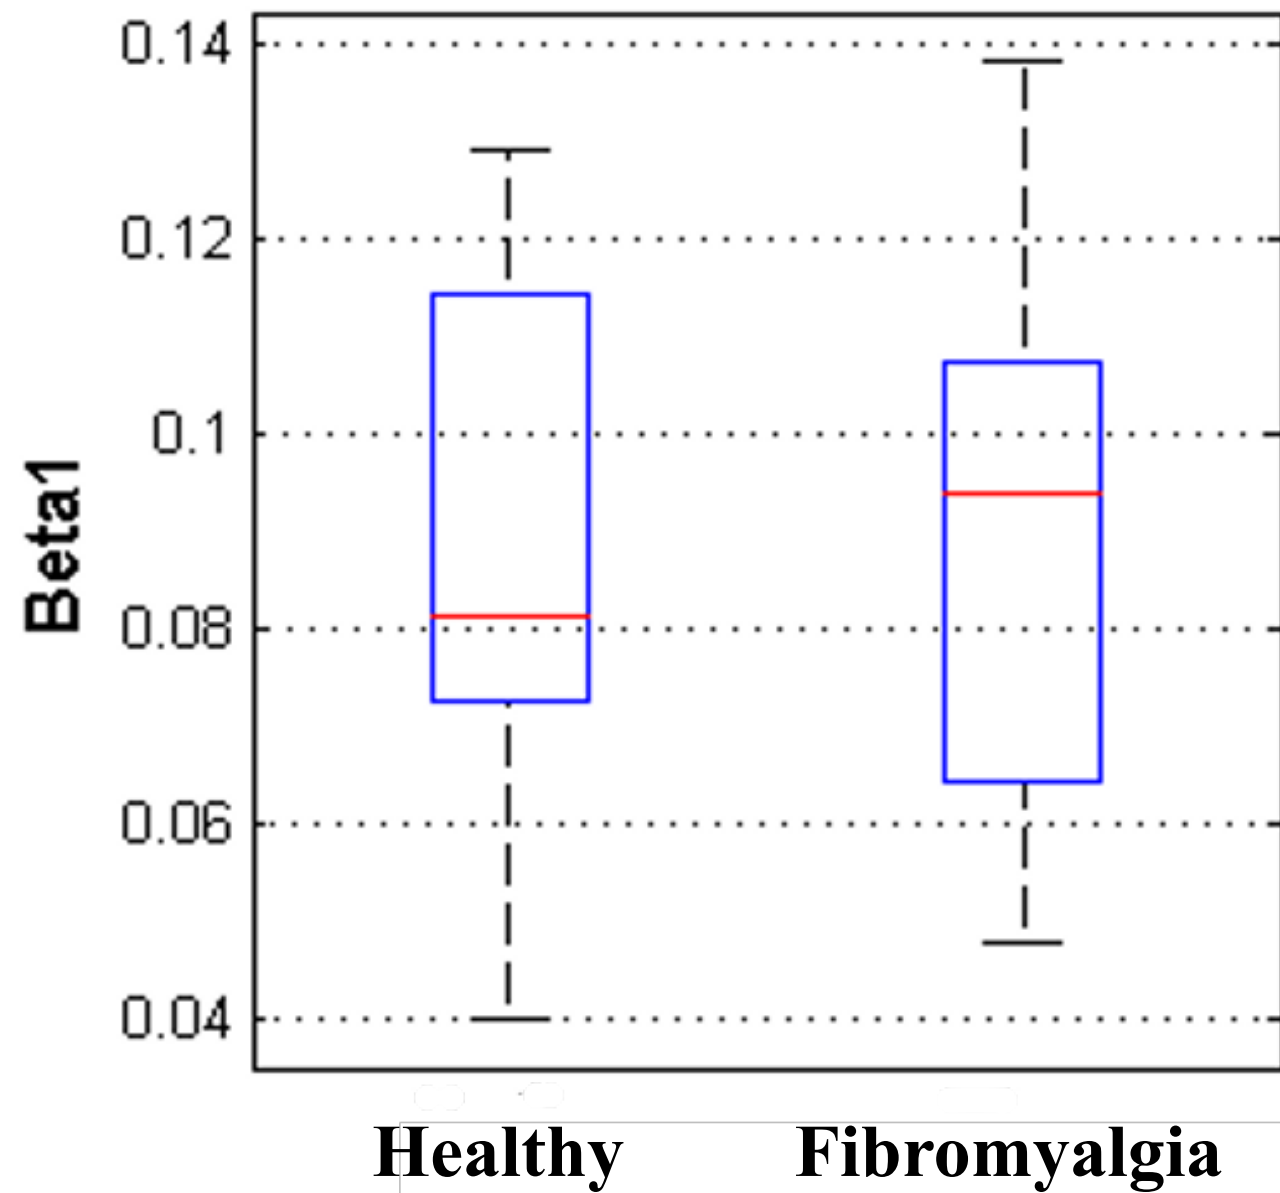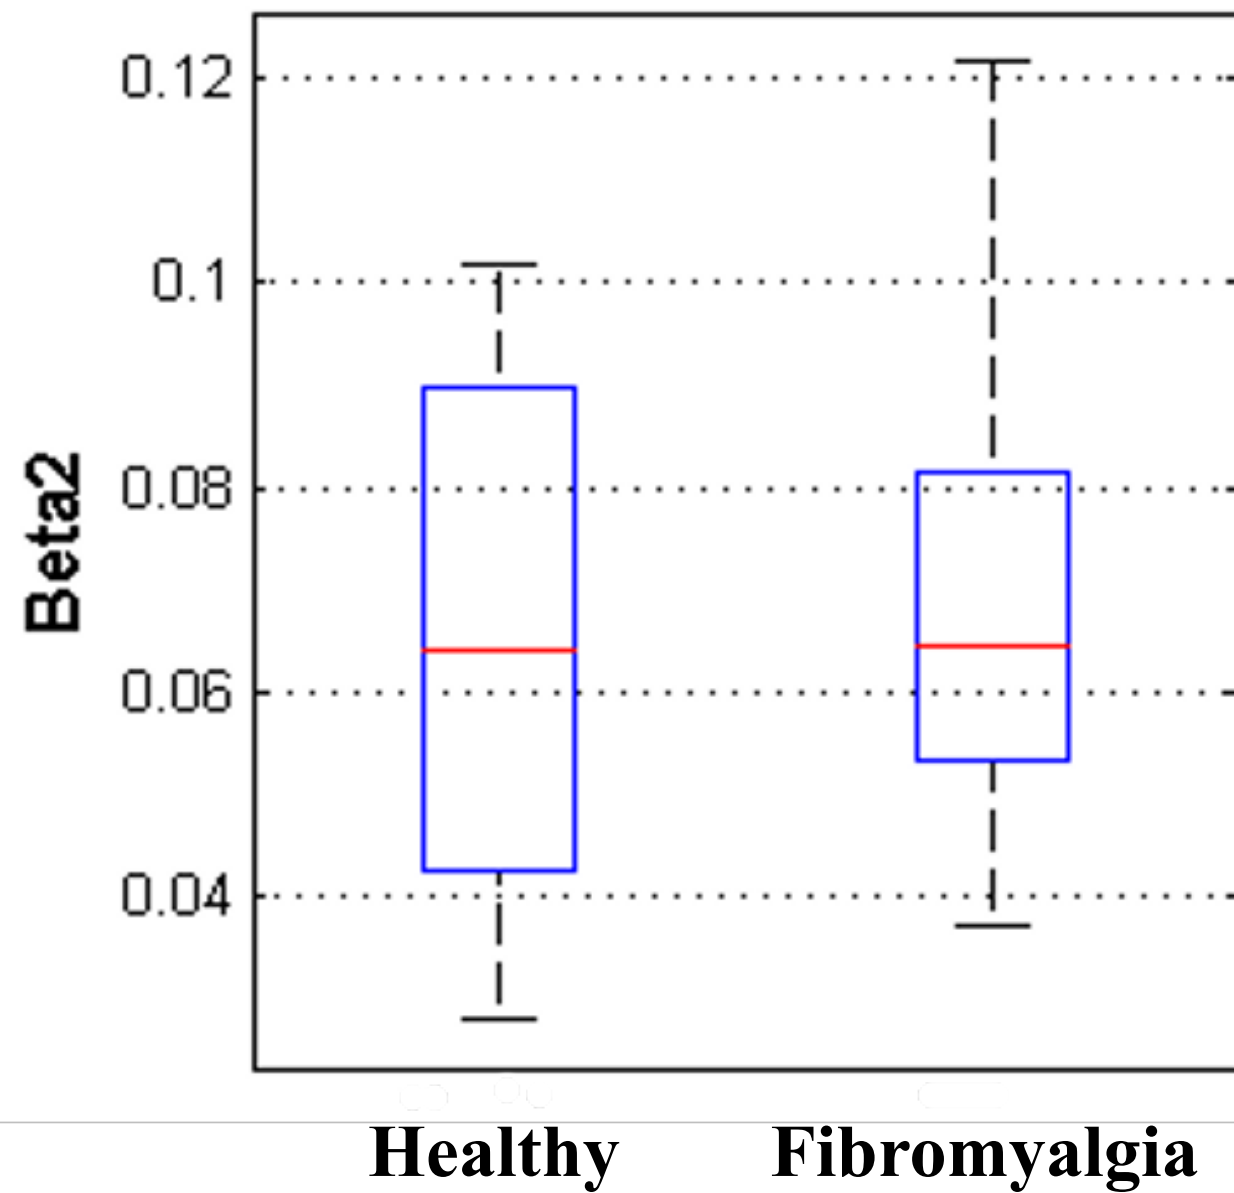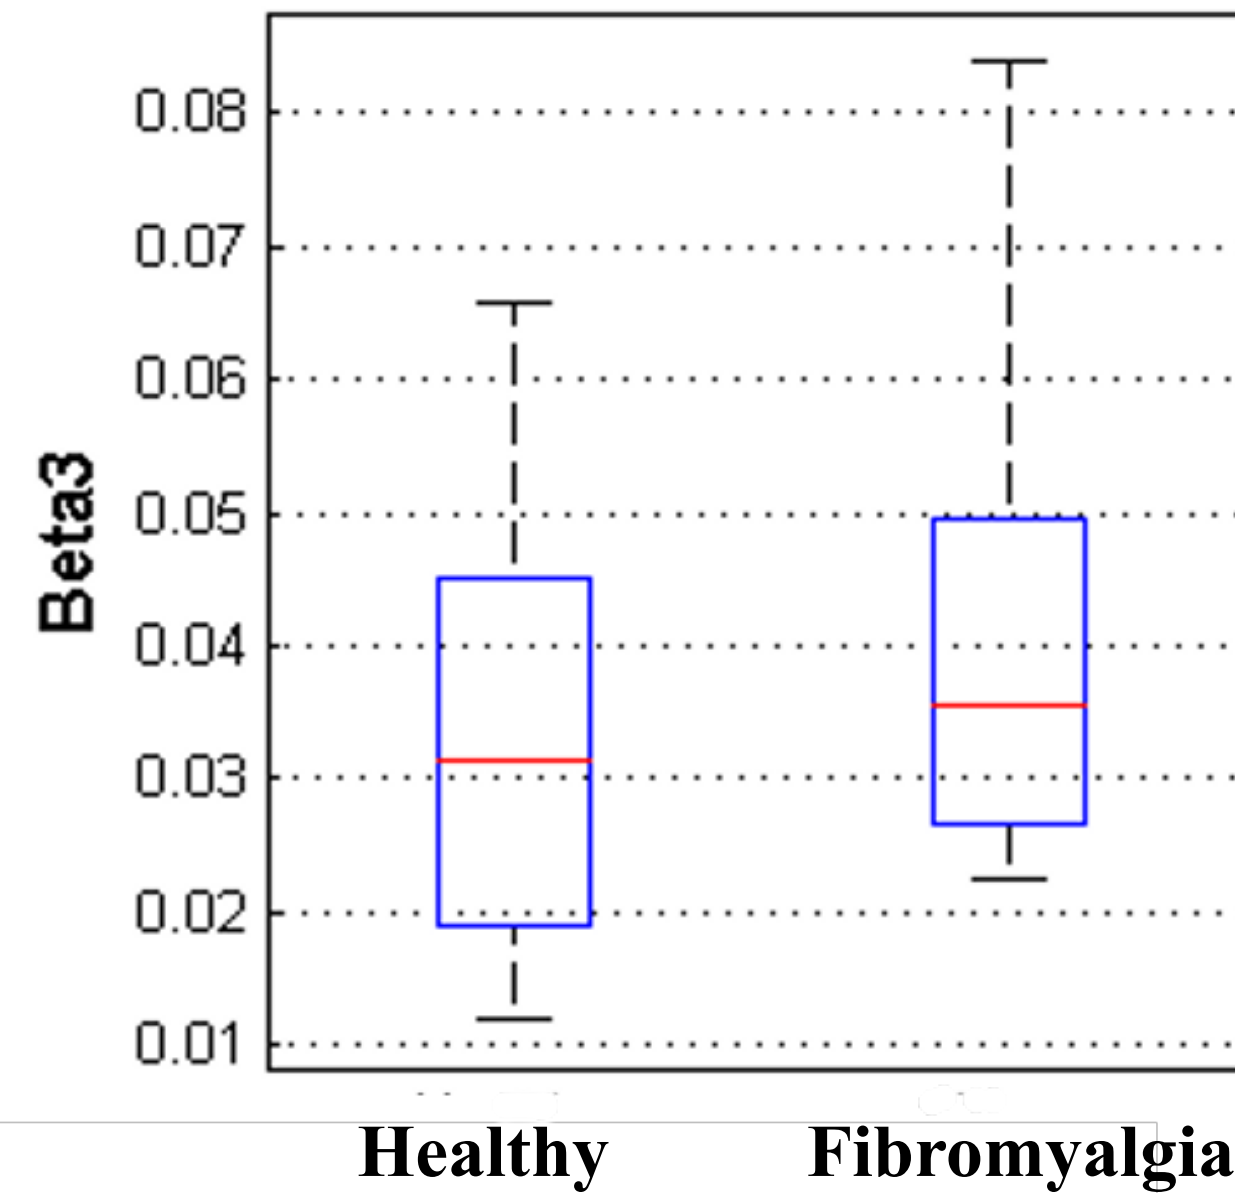

**Central Area**

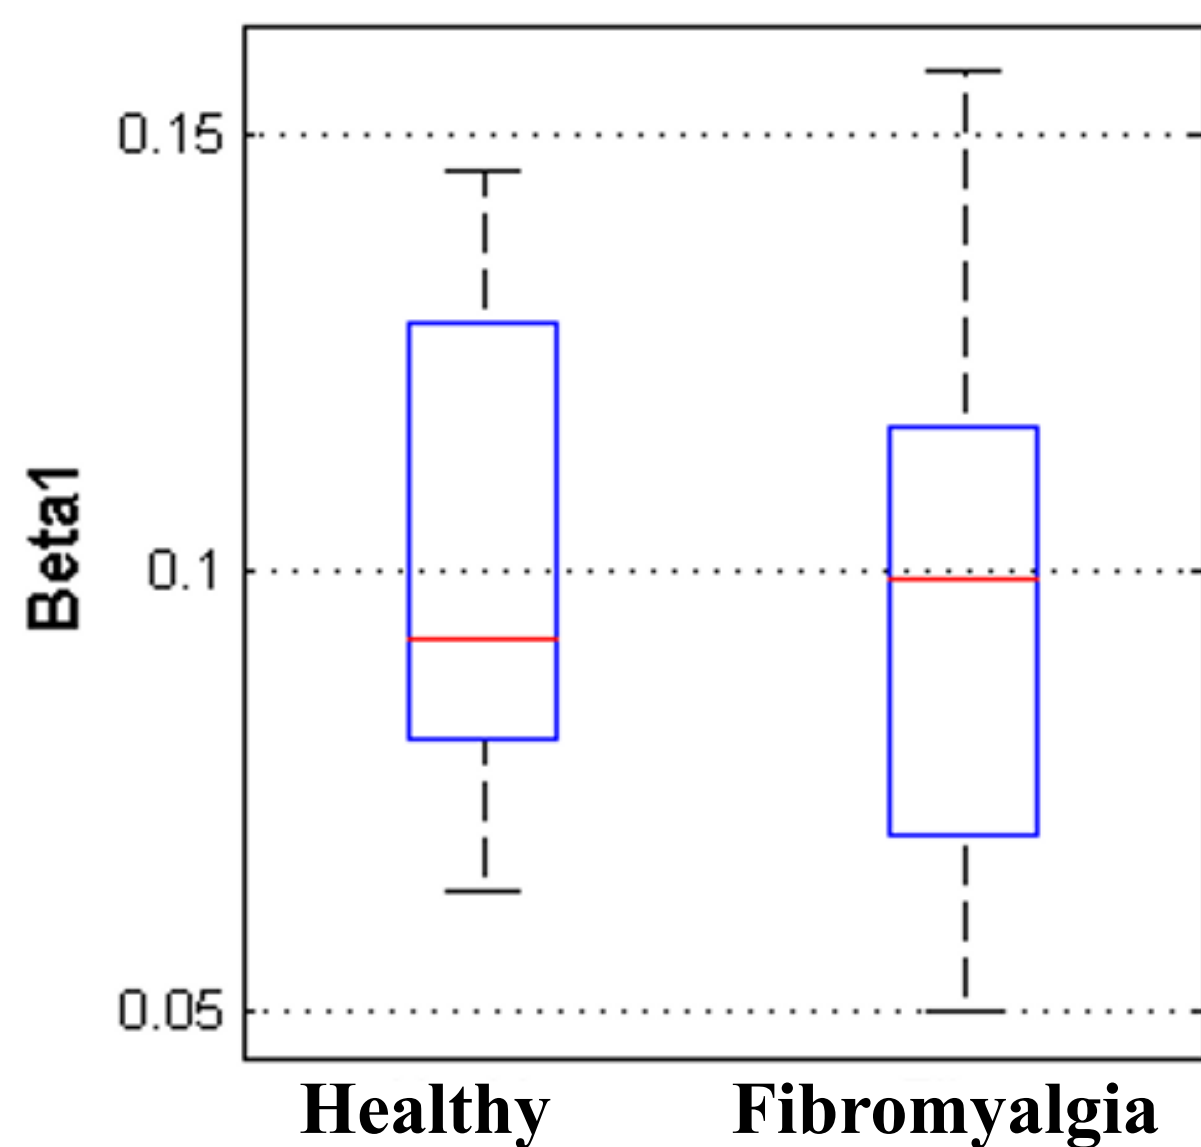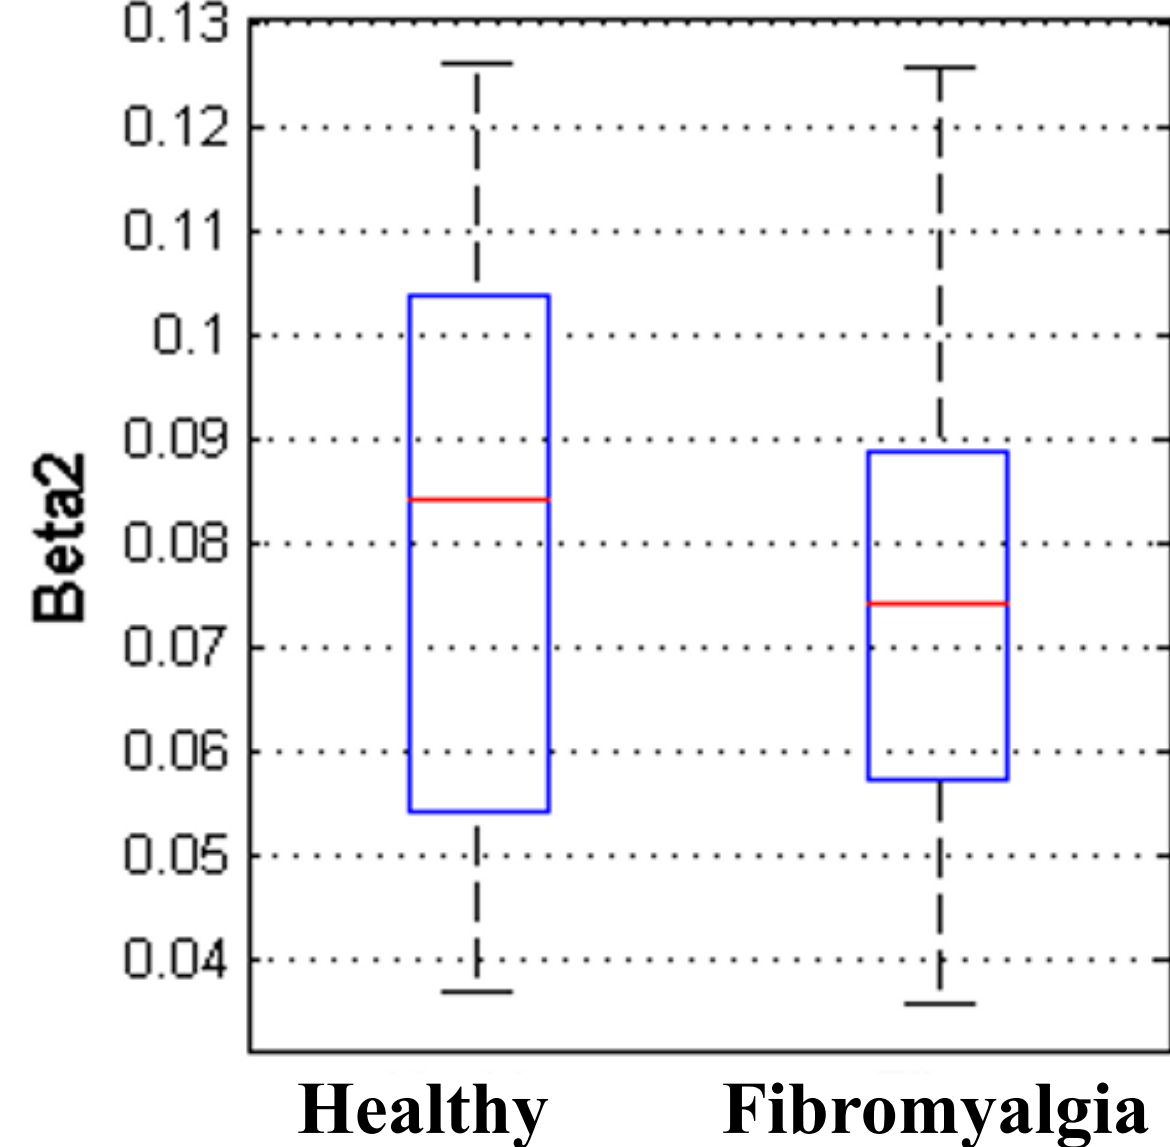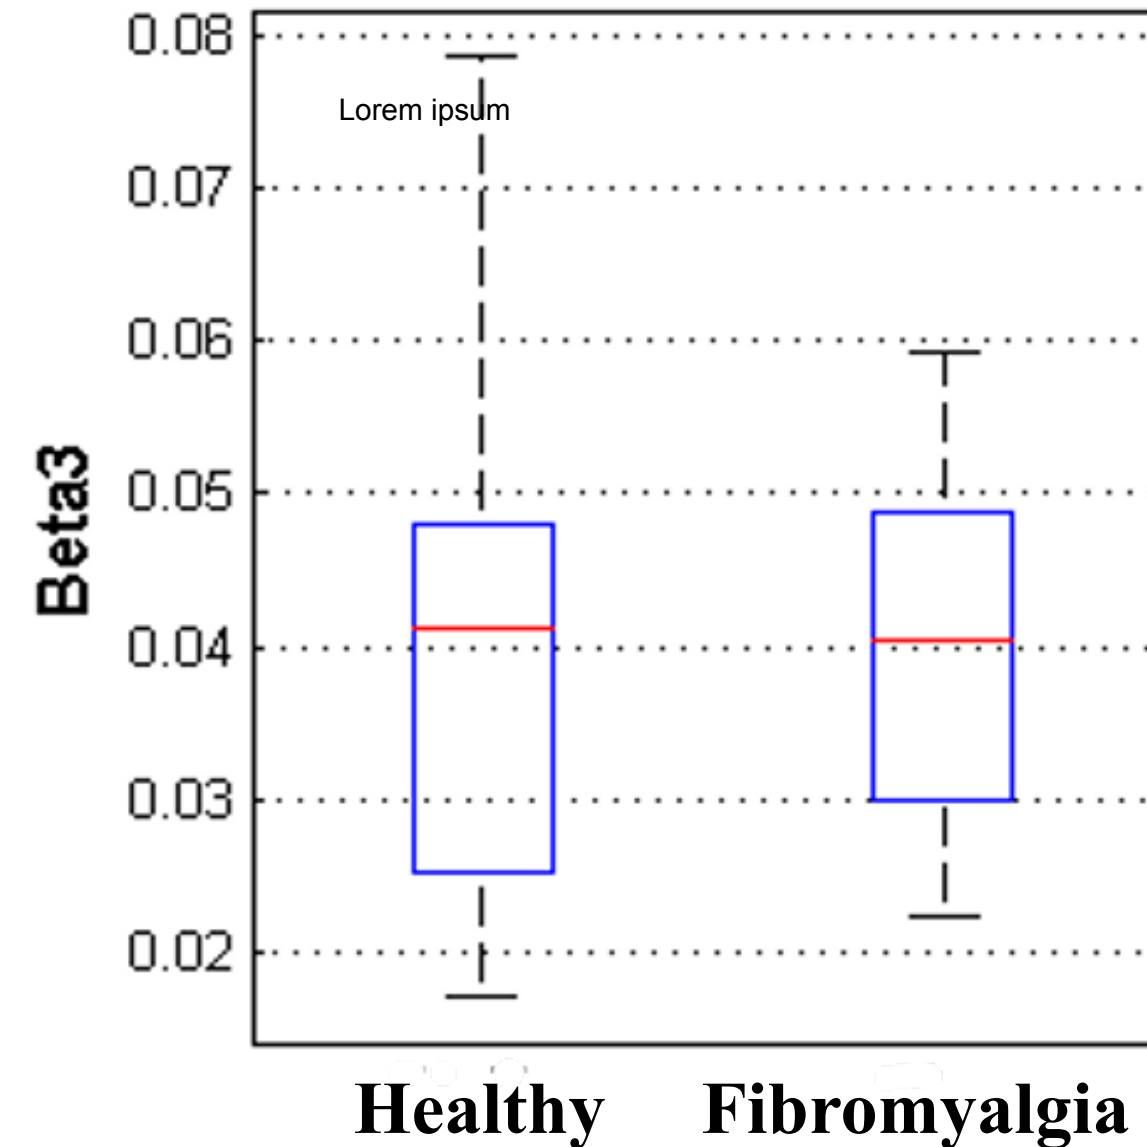

Lorem ipsum

Supplement: 12891_2024_7824_MOESM2_ESM.pdf [file 12891_2024_7824_MOESM2_ESM.pdf]

**FIGURE 4**

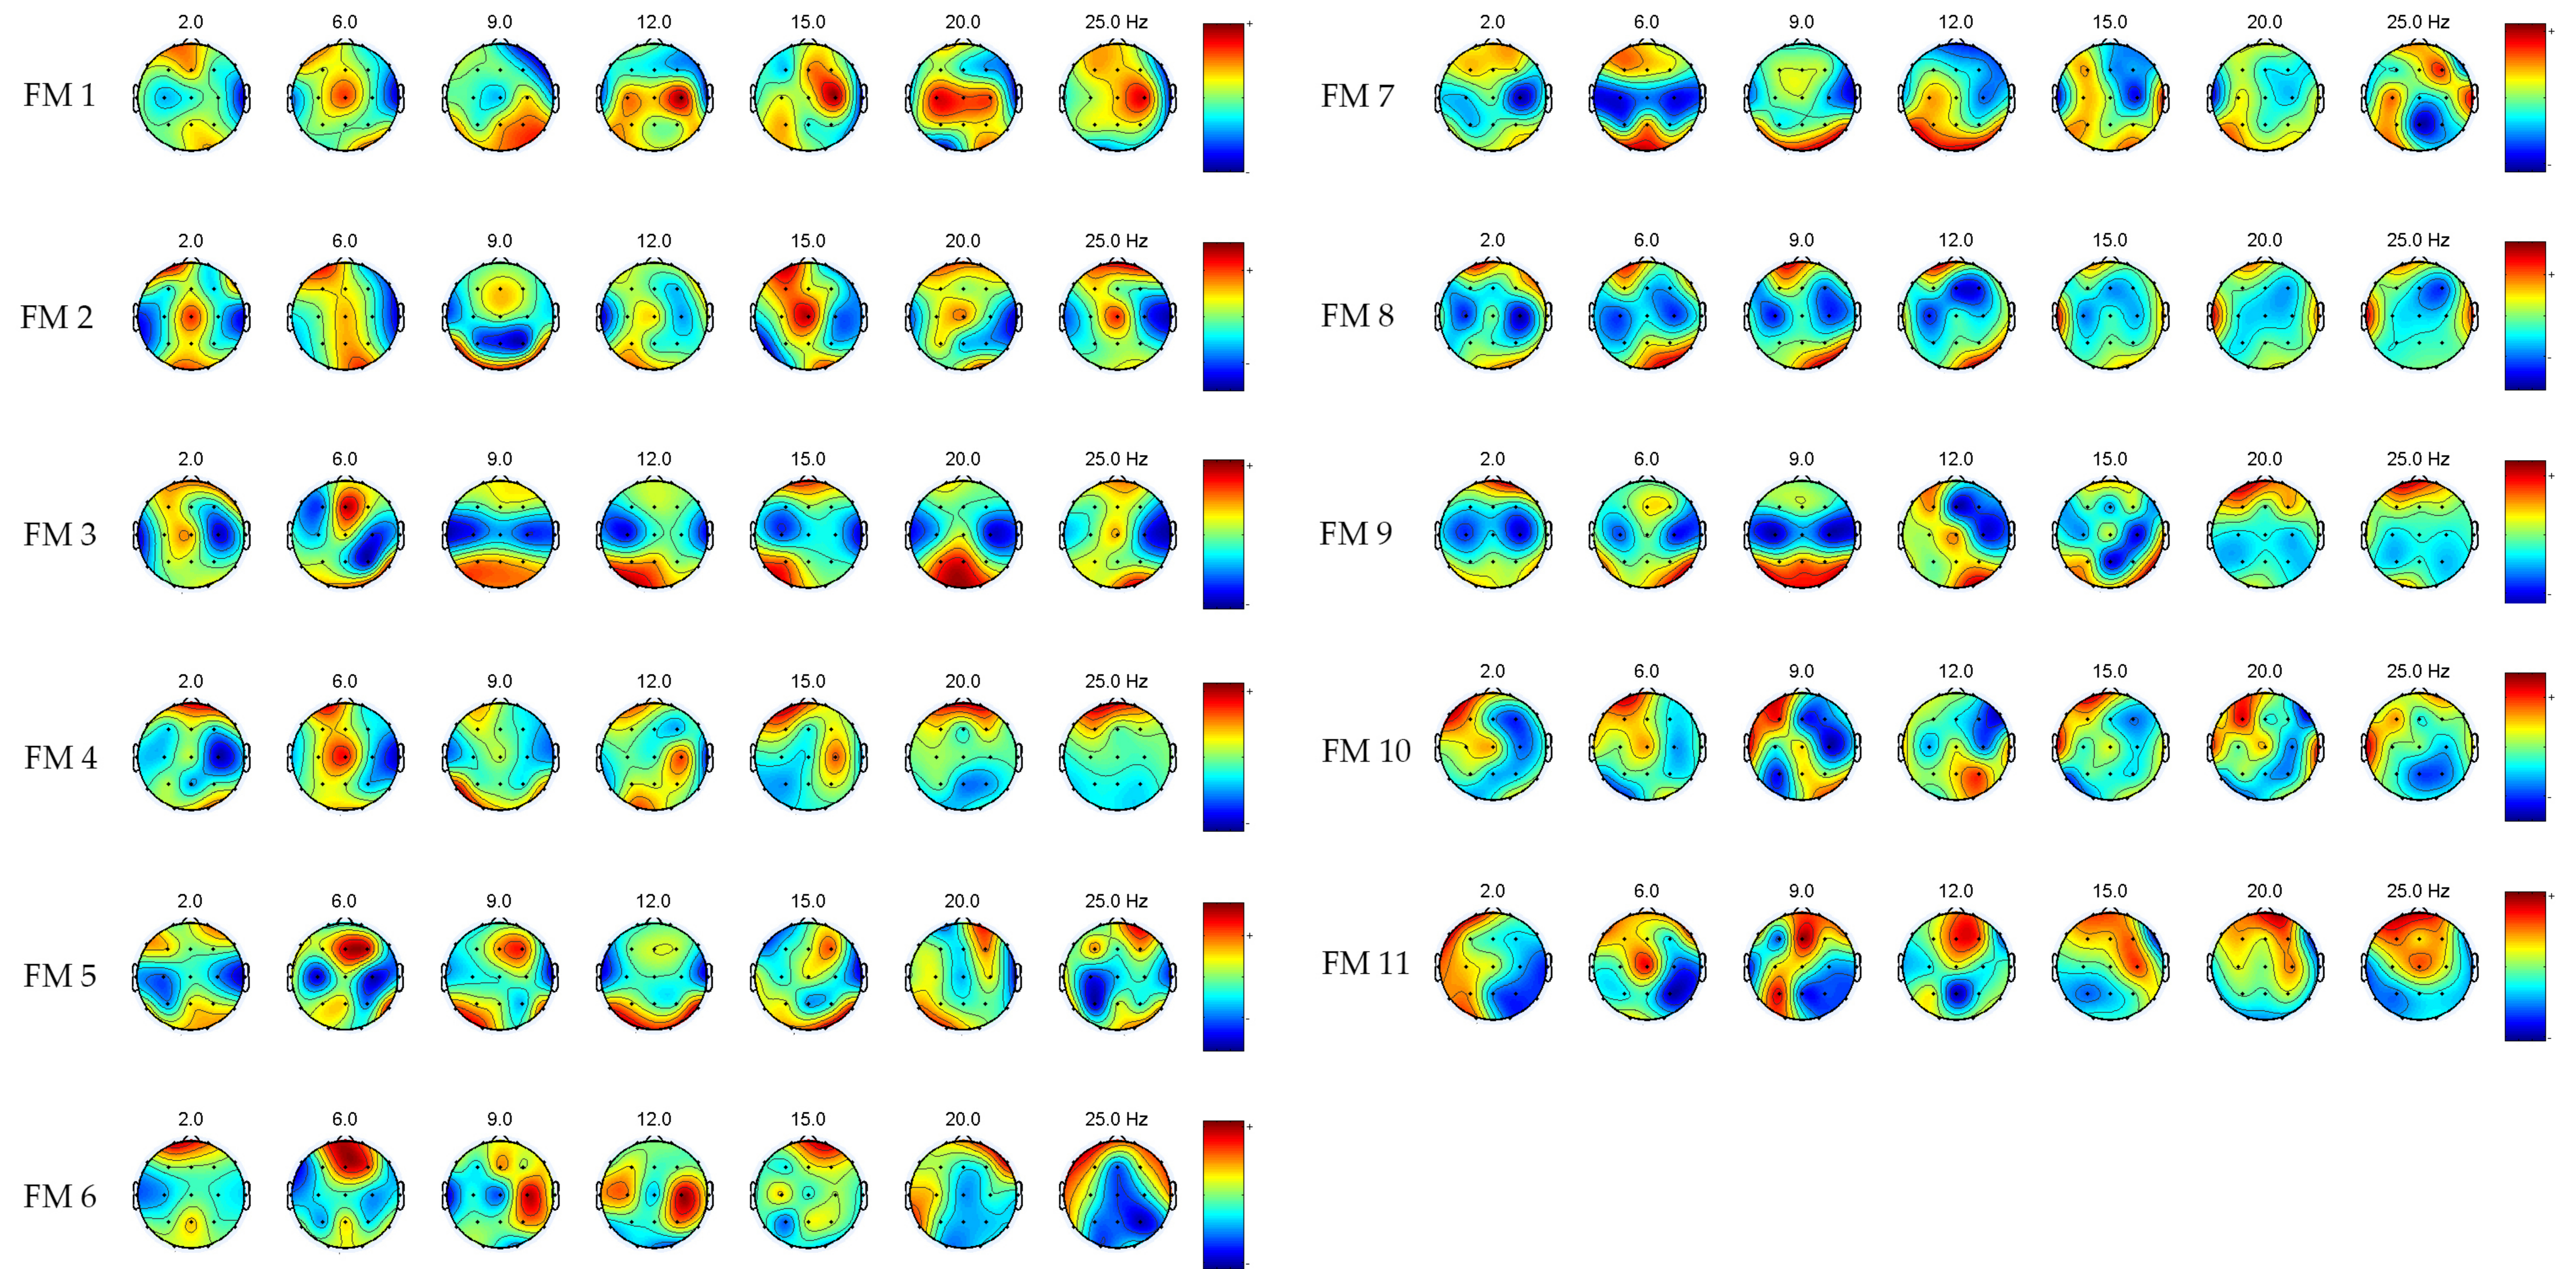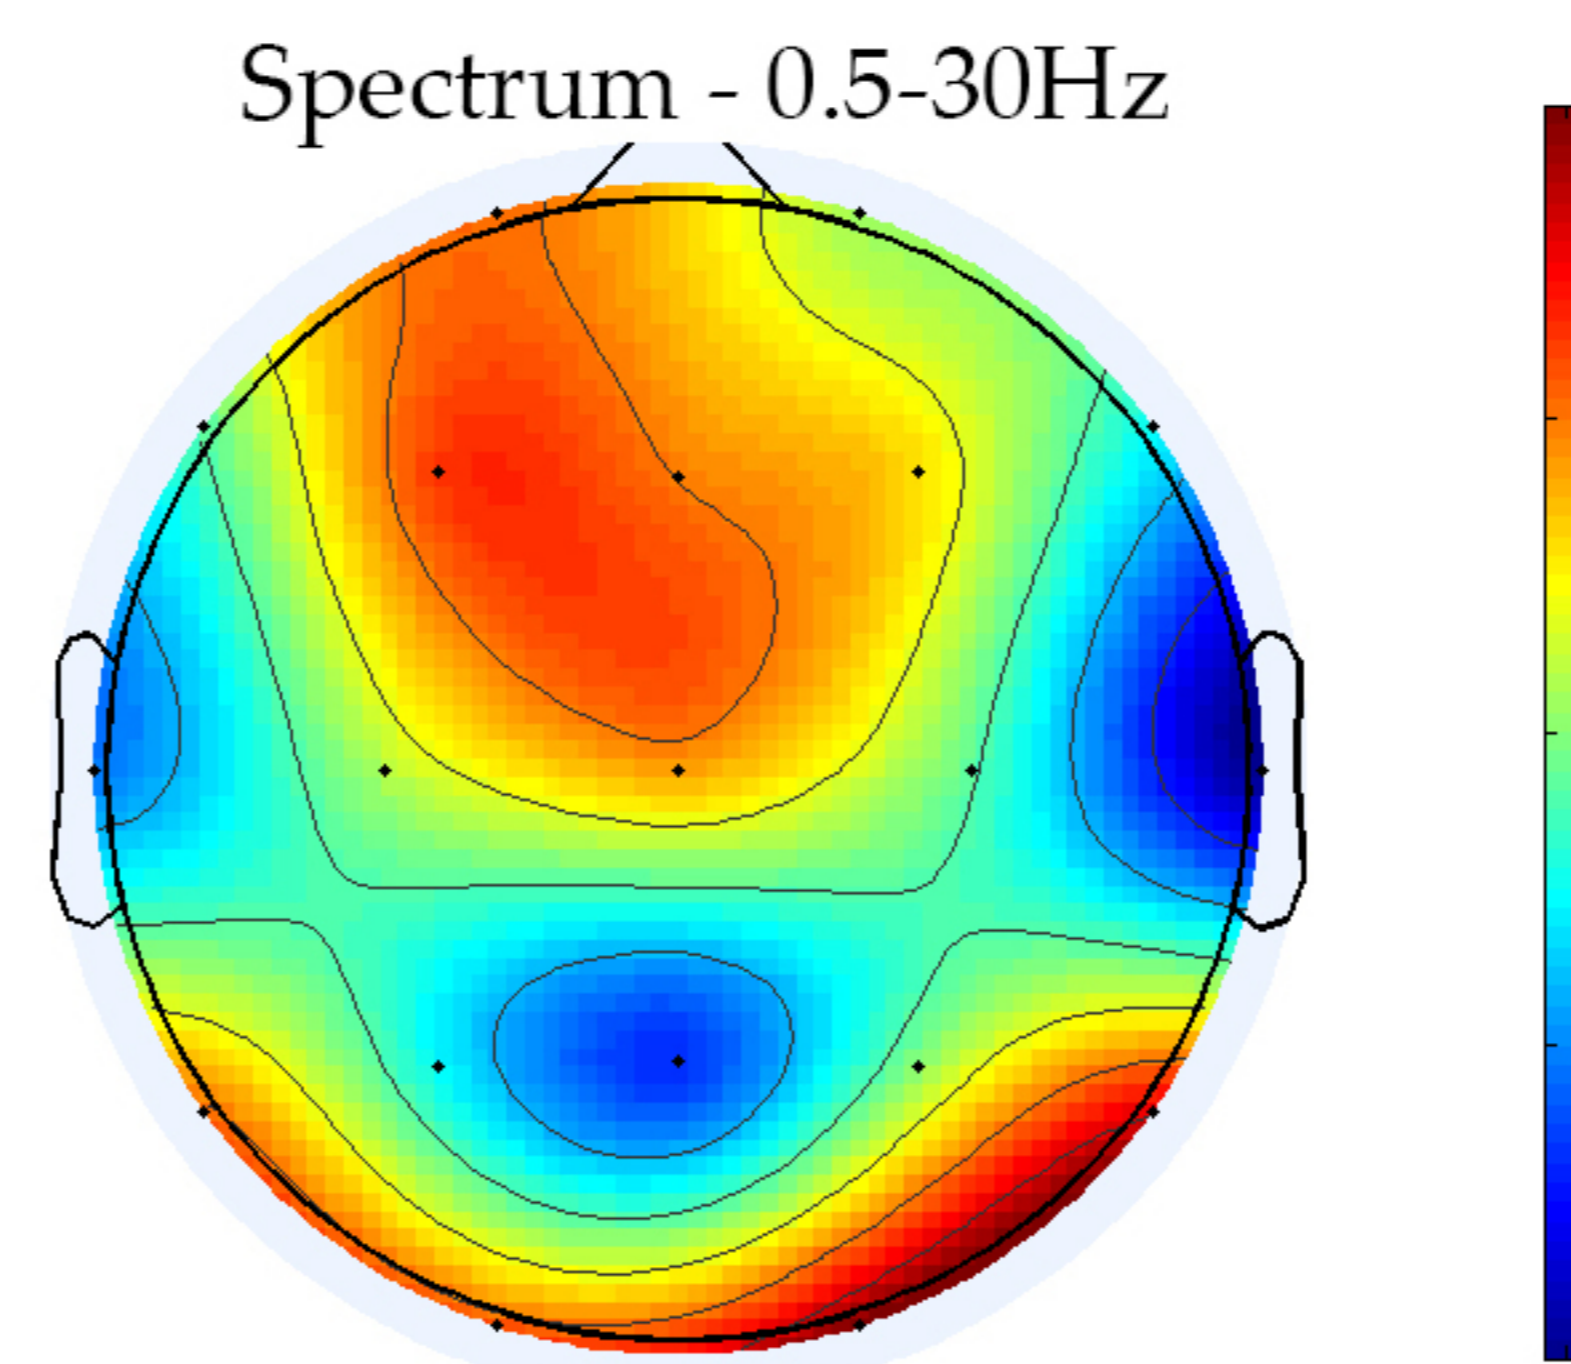

Average topographical EEG mapping from 11 fibromyalgia patients

Supplement: 12891_2024_7824_MOESM3_ESM.pdf [file 12891_2024_7824_MOESM3_ESM.pdf]

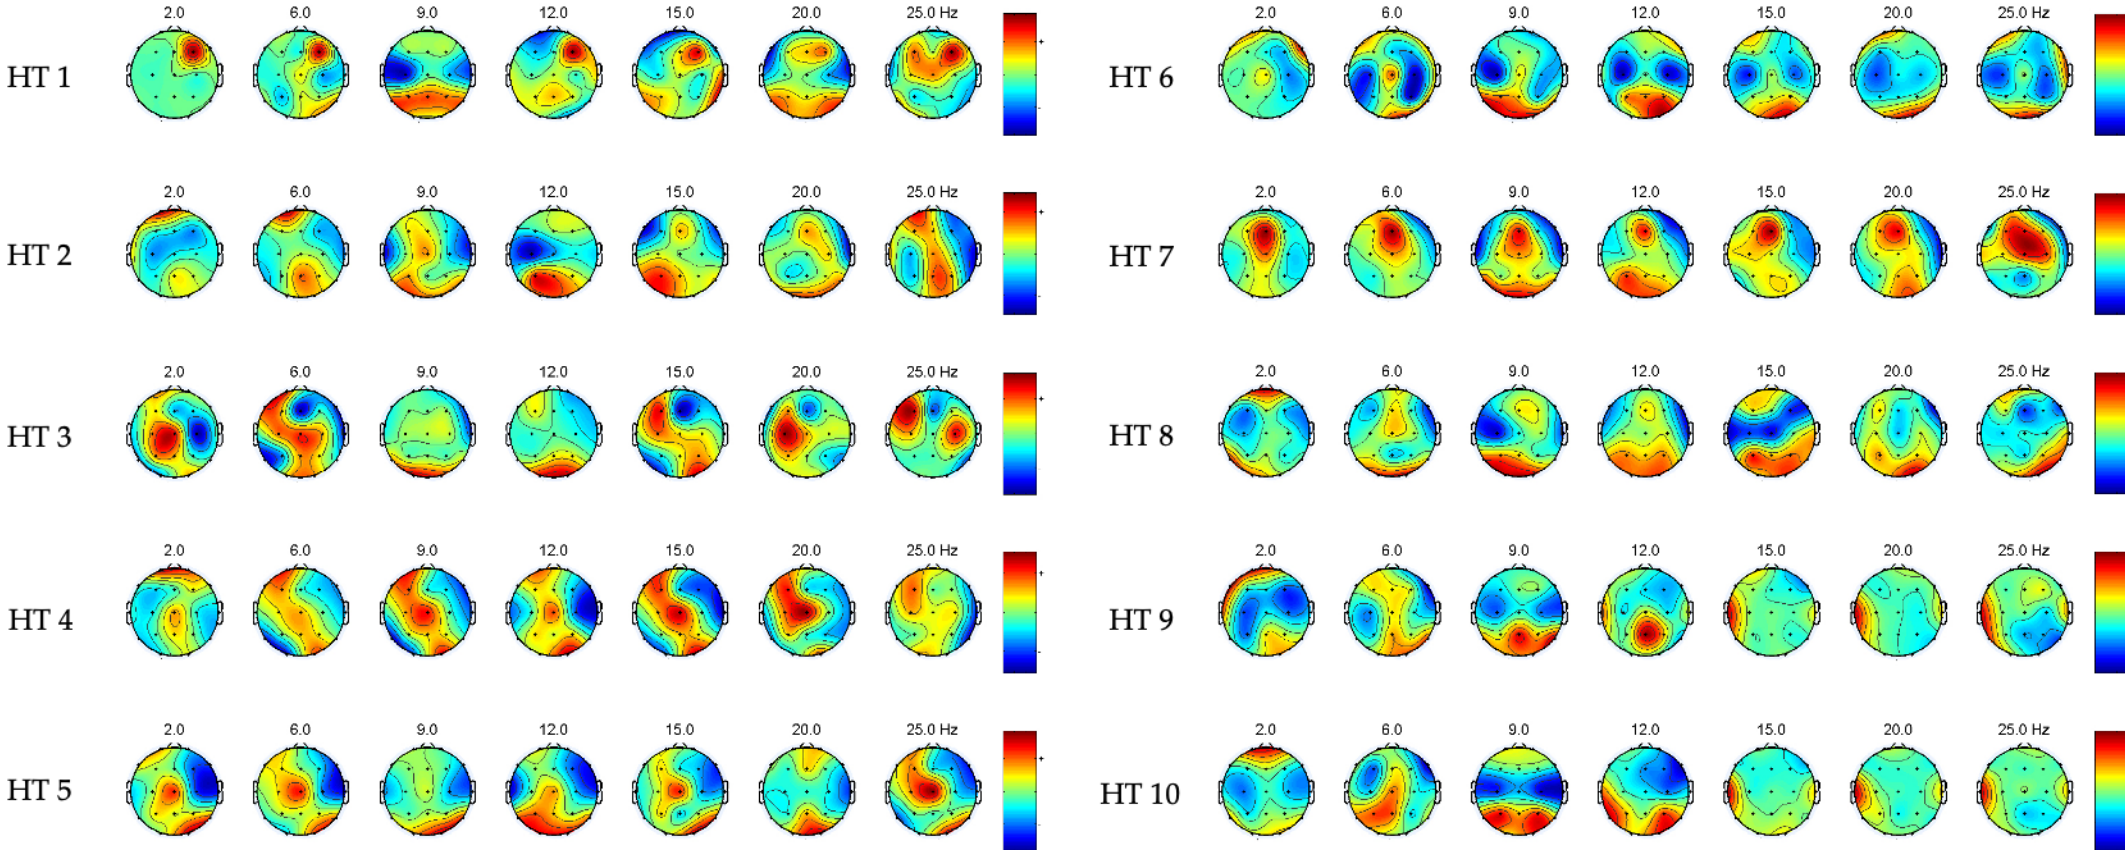

**FIGURE 5**

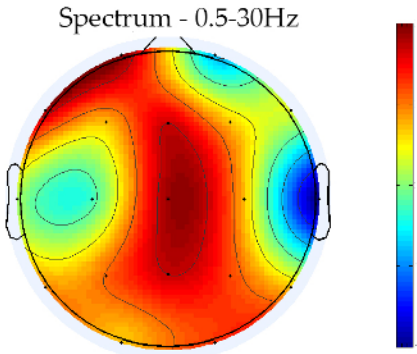

Average topographical EEG mapping from 10 healthy controls

Supplement: 12891_2024_7824_MOESM4_ESM.pdf [file 12891_2024_7824_MOESM4_ESM.pdf]
